# Supplementary material for: Exploring the persistence of the fluorinated thiolate 2,3,5,6-S(C6F4H-4) motif to establish πF–πF stacking in metal complexes: a crystal engineering perspective
Source: Royal Society of Chemistry journal article supplement (doi:10.1039/d4dt01978d), 2024-01-01
Supplement: d4dt01978d1.pdf [file d4dt01978d1.pdf]

## Exploring the persistence of the fluorinated thiolate 2,3,5,6-S(C<sub>6</sub>F<sub>4</sub>H-4) motif to establish $\pi_F$ - $\pi_F$ stacking in metal complexes: A Crystal Engineering Perspective

Everardo Jaime-Adán<sup>a</sup>, Juan Manuel Germán-Acacio<sup>b\*</sup>, José Carlos Páez-Franco<sup>b</sup>, Victor Lara,<sup>c</sup> Viviana Reyes-Marquez<sup>a</sup> and David Morales-Morales<sup>a\*</sup>

<sup>a</sup>Instituto de Química, Universidad Nacional Autónoma de México, Circuito Exterior, Ciudad Universitaria, Ciudad de México. C. P. 04510, México. <sup>b</sup>Red de Apoyo a la Investigación, Universidad Nacional Autónoma de México-CIC, Instituto Nacional de Ciencias Médicas y Nutrición SZ, C. P.14000, Ciudad de México, México. <sup>c</sup>Universidad Autónoma Metropolitana, Iztapalapa, Av. San Rafael Atlixco No. 186, Col. Vicentina, 09340 Ciudad de México, Mexico. <sup>d</sup>Departamento de Ciencias Químico-Biológicas, Universidad de Sonora, Luis Encinas y Rosales s/n, Hermosillo C.P. 83000, Sonora, Mexico

Corresponding authors: [jmga@cic.unam.mx](mailto:jmga@cic.unam.mx); [damor@unam.mx](mailto:damor@unam.mx)

### CCDC Cambridge Structural Database (CSD)

Using Conquest from the CSD, we searched for tetrafluorinated thiols (2,3,5,6) having a metal using the label 4M. We found 87 crystal structures from which we obtained the  $\pi$ - $\pi$  parameters using the PLATON software. As referenced above, we are interested in the  $\pi$ - $\pi$  parameters centroid-centroid distance (ccd); plane-plane distance (ppd); angle of displacement plane-perpendicular (adpp); and slippage. Of this parameters we filter the results using  $ccd < 4 \text{ \AA}$  and  $adpp < 20^\circ$ . We end up with 51 crystal structures.

Compound Au\_1 (AROSUV) has a ccd distance of 3.650(5) angstrom, a plane-plane angle (ppa) of 4.3(4) degrees , and a slippage of 1.143 angstrom. REF: S.Watase, T.Kitamura, N.Kanehisa, M.Nakamoto, Y.Kai, S.YanagidaActa Crystallogr.,Sect.C:Cryst.Struct.Commun. 60m1042004

Compound Au\_2 (AROSUV) has a ccd distance of 3.652(5) angstrom, a plane-plane angle (ppa) of 0.0(4) degrees , and a slippage of 1.187 angstrom. REF: S.Watase, T.Kitamura, N.Kanehisa, M.Nakamoto, Y.Kai, S.YanagidaActa Crystallogr.,Sect.C:Cryst.Struct.Commun. 60m1042004

Compound Au\_3 (AROSUV01) has a ccd distance of 3.581(3) angstrom, a plane-plane angle (ppa) of 0.0(2) degrees , and a slippage of 1.204 angstrom. REF: G.Moreno-Alcantar, L.Turcio-Garcia, J.M.Guevara-Vela, E.Romero-Montalvo, T.Rocha-Rinza, A.M.Pendas, M.Flores-Alamo, H.TorrensInorg.Chem. 5986672020

Compound Au\_4 (BUSROZ) has a ccd distance of 3.917(5) angstrom, a plane-plane angle (ppa) of 0.0(4) degrees , and a slippage of 1.326 angstrom. REF: G.Romo-Islas, G.Moreno-Alcantar, M.Flores-Alamo, H.TorrensJ.Fluorine Chem. 2361095782020

Compound Au\_5 (IMAKOZ) has a ccd distance of 3.4903(16) angstrom, a plane-plane angle (ppa) of .03(14) degrees , and a slippage of 0.992 angstrom. REF: G.Moreno-

Alcantar, C.Diaz-Rosas, A.Fernandez-Alarcon, L.Turcio-Garcia, M.Flores-Alamo, T.Rocha-Rinza, H.TorrensInorganics 9142021

Compound Au\_6 (LOKWE0) has a ccd distance of 3.504(3) angstrom, a plane-plane angle (ppa) of 0.0(3) degrees , and a slippage of 1.127 angstrom. REF: R.E.Bachman, S.A.Bodolosky-Bettis, C.J.Pyle, M.A.GrayJ.Am.Chem.Soc. 130143032008

Compound Cd\_1 (CANVUL) has a ccd distance of 3.621(3) angstrom, a plane-plane angle (ppa) of 4.0(2) degrees , and a slippage of 1.185 angstrom. REF: R.P.Burwood, A.K.CheethamCSD Communication(Private Communication) 2016

Compound Cd\_2 (CANVUL) has a ccd distance of 3.621(3) angstrom, a plane-plane angle (ppa) of 4.0(2) degrees , and a slippage of 1.188 angstrom. REF: R.P.Burwood, A.K.CheethamCSD Communication(Private Communication) 2016

Compound Co\_1 (COSJOJ) has a ccd distance of 3.662(4) angstrom, a plane-plane angle (ppa) of 25.2(3) degrees , and a slippage of angstrom. REF: P.Doppelt, J.Fischer, R.WeissJ.Am.Chem.Soc. 10651881984

Compound Co\_2 (COSJOJ) has a ccd distance of 3.663(4) angstrom, a plane-plane angle (ppa) of 25.2(3) degrees , and a slippage of angstrom. REF: P.Doppelt, J.Fischer, R.WeissJ.Am.Chem.Soc. 10651881984

Compound Co\_3 (COSJOJ) has a ccd distance of 3.839(5) angstrom, a plane-plane angle (ppa) of 25.9(3) degrees , and a slippage of angstrom. REF: P.Doppelt, J.Fischer, R.WeissJ.Am.Chem.Soc. 10651881984

Compound Co\_4 (COSJOJ) has a ccd distance of 3.839(5) angstrom, a plane-plane angle (ppa) of 25.9(3) degrees , and a slippage of angstrom. REF: P.Doppelt, J.Fischer, R.WeissJ.Am.Chem.Soc. 10651881984

Compound Co\_5 (COSJOJ) has a ccd distance of 3.853(5) angstrom, a plane-plane angle (ppa) of 27.8(4) degrees , and a slippage of angstrom. REF: P.Doppelt, J.Fischer, R.WeissJ.Am.Chem.Soc. 10651881984

Compound Co\_6 (COSJUP) has a ccd distance of 3.376(4) angstrom, a plane-plane angle (ppa) of 14.1(3) degrees , and a slippage of 0.064 angstrom. REF: P.Doppelt, J.Fischer, R.WeissJ.Am.Chem.Soc. 10651881984

Compound Co\_7 (COSJUP) has a ccd distance of 3.377(4) angstrom, a plane-plane angle (ppa) of 14.1(3) degrees , and a slippage of 0.808 angstrom. REF: P.Doppelt, J.Fischer, R.WeissJ.Am.Chem.Soc. 10651881984

Compound Co\_8 (COSJUP) has a ccd distance of 3.616(3) angstrom, a plane-plane angle (ppa) of 20.6(2) degrees , and a slippage of angstrom. REF: P.Doppelt, J.Fischer, R.WeissJ.Am.Chem.Soc. 10651881984

Compound Co\_9 (FOLWIM) has a ccd distance of 3.630(6) angstrom, a plane-plane angle (ppa) of 16.7(5) degrees , and a slippage of 0.757 angstrom. REF: P.Doppelt, J.Fischer, L.Ricard, R.WeissNew J.Chem. 113571987

Compound Co\_10 (FOLWOS) has a ccd distance of 3.613(7) angstrom, a plane-plane angle (ppa) of 21.5(6) degrees , and a slippage of angstrom. REF: P.Doppelt, J.Fischer, L.Ricard, R.WeissNew J.Chem. 113571987

Compound Fe\_1 (DIDCEY) has a ccd distance of 3.734(4) angstrom, a plane-plane angle (ppa) of 28.8(3) degrees , and a slippage of angstrom. REF: P.Doppelt, J.Fischer, R.WeissCroat.Chem.Acta 575071984

Compound Fe\_2 (DIDCEY) has a ccd distance of 3.734(4) angstrom, a plane-plane angle (ppa) of 28.8(3) degrees , and a slippage of angstrom. REF: P.Doppelt, J.Fischer, R.WeissCroat.Chem.Acta 575071984

Compound Fe\_3 (DIDCEY) has a ccd distance of 3.773(4) angstrom, a plane-plane angle (ppa) of 28.8(3) degrees , and a slippage of angstrom. REF: P.Doppelt, J.Fischer, R.WeissCroat.Chem.Acta 575071984

Compound Fe\_4 (DIDCEY) has a ccd distance of 3.774(4) angstrom, a plane-plane angle (ppa) of 28.8(3) degrees , and a slippage of angstrom. REF: P.Doppelt, J.Fischer, R.WeissCroat.Chem.Acta 575071984

Compound Fe\_5 (GAHLIK) has a ccd distance of 3.892(9) angstrom, a plane-plane angle (ppa) of 30.8(8) degrees , and a slippage of angstrom. REF: M.Schnappacher, L.Ricard, J.Fischer, R.Weiss, E.Bill, R.Montiel-Montoya, H.Winkler, A.X.TrautweinEur.J.Biochem. 1684191987

Compound Fe\_6 (GAHLOQ) has a ccd distance of 3.621(5) angstrom, a plane-plane angle (ppa) of 21.1(5) degrees , and a slippage of angstrom. REF: M.Schnappacher, L.Ricard, J.Fischer, R.Weiss, E.Bill, R.Montiel-Montoya, H.Winkler, A.X.TrautweinEur.J.Biochem. 1684191987

Compound Fe\_7 (KULWOD) has a ccd distance of 3.681(4) angstrom, a plane-plane angle (ppa) of 26.3(3) degrees , and a slippage of angstrom. REF: H.Nasri, K.J.Haller, Yaning Wang, Boi Hanh Huynh, W.R.ScheidtInorg.Chem. 3134591992

Compound Ir\_1 (LULJOU) has a ccd distance of 3.312(3) angstrom, a plane-plane angle (ppa) of 10.9(2) degrees , and a slippage of 0.466 angstrom. REF: I.Eslava-Gonzalez, H.Valdes, M.T.Ramirez-Apan, S.Hernandez-Ortega, M.R.Zermeno-Ortega, A.Avila-Sorrosa, D.Morales-MoralesInorg.Chim.Acta 5071195882020

Compound Ir\_2 (LULJOU) has a ccd distance of 3.313(3) angstrom, a plane-plane angle (ppa) of 10.9(2) degrees , and a slippage of 1.054 angstrom. REF: I.Eslava-Gonzalez, H.Valdes, M.T.Ramirez-Apan, S.Hernandez-Ortega, M.R.Zermeno-Ortega, A.Avila-Sorrosa, D.Morales-MoralesInorg.Chim.Acta 5071195882020

Compound Ir\_3 (LULJOU) has a ccd distance of 3.316(3) angstrom, a plane-plane angle (ppa) of 7.8(2) degrees , and a slippage of 0.708 angstrom. REF: I.Eslava-Gonzalez, H.Valdes, M.T.Ramirez-Apan, S.Hernandez-Ortega, M.R.Zermeno-Ortega, A.Avila-Sorrosa, D.Morales-MoralesInorg.Chim.Acta 5071195882020

Compound Ir\_4 (LULJOU) has a ccd distance of 3.316(3) angstrom, a plane-plane angle (ppa) of 7.8(2) degrees , and a slippage of 0.591 angstrom. REF: I.Eslava-Gonzalez, H.Valdes, M.T.Ramirez-Apan, S.Hernandez-Ortega, M.R.Zermeno-Ortega, A.Avila-Sorrosa, D.Morales-MoralesInorg.Chim.Acta 5071195882020

Compound Ni\_1 (WUNQUR) has a ccd distance of 3.447(3) angstrom, a plane-plane angle (ppa) of 7.1(3) degrees , and a slippage of 0.742 angstrom. REF: M.A.Uson, J.M.LlanosJ.Organomet.Chem. 663982002

Compound Ni\_2 (WUNQUR) has a ccd distance of 3.448(3) angstrom, a plane-plane angle (ppa) of 7.1(3) degrees , and a slippage of 1.072 angstrom. REF: M.A.Uson, J.M.LlanosJ.Organomet.Chem. 663982002

Compound Ni\_3 (WUNQUR) has a ccd distance of 3.956(3) angstrom, a plane-plane angle (ppa) of 0.0(3) degrees , and a slippage of 0.832 angstrom. REF: M.A.Uson, J.M.LlanosJ.Organomet.Chem. 663982002

Compound Ni\_4 (WUNRAY) has a ccd distance of 3.3915(18) angstrom, a plane-plane angle (ppa) of .00(14) degrees , and a slippage of 1.158 angstrom. REF: M.A.Uson, J.M.LlanosJ.Organomet.Chem. 663982002

Compound Ni\_5 (WUNRAY) has a ccd distance of 3.463(2) angstrom, a plane-plane angle (ppa) of .50(17) degrees , and a slippage of 0.993 angstrom. REF: M.A.Uson, J.M.LlanosJ.Organomet.Chem. 663982002

Compound Ni\_6 (WUNRAY) has a ccd distance of 3.463(2) angstrom, a plane-plane angle (ppa) of .50(17) degrees , and a slippage of 0.414 angstrom. REF: M.A.Uson, J.M.LlanosJ.Organomet.Chem. 663982002

Compound Ni\_7 (WUNRAY) has a ccd distance of 3.4643(19) angstrom, a plane-plane angle (ppa) of .52(15) degrees , and a slippage of 0.713 angstrom. REF: M.A.Uson, J.M.LlanosJ.Organomet.Chem. 663982002

Compound Ni\_8 (WUNRAY) has a ccd distance of 3.4644(19) angstrom, a plane-plane angle (ppa) of .52(15) degrees , and a slippage of 1.032 angstrom. REF: M.A.Uson, J.M.LlanosJ.Organomet.Chem. 663982002

Compound Ni\_9 (WUNRAY) has a ccd distance of 3.509(2) angstrom, a plane-plane angle (ppa) of .72(17) degrees , and a slippage of 1.131 angstrom. REF: M.A.Uson, J.M.LlanosJ.Organomet.Chem. 663982002

Compound Os\_1 (ECERIP) has a ccd distance of 3.591(4) angstrom, a plane-plane angle (ppa) of 0.0(3) degrees , and a slippage of 1.104 angstrom. REF: M.Ceron, L.Melendez, S.Bernes, M.Arroyo, A.Ramirez-MonroyJ.Chem.Cryst. 4211192012

Compound Os\_2 (ECERIP) has a ccd distance of 3.931(4) angstrom, a plane-plane angle (ppa) of 19.0(3) degrees , and a slippage of 1.322 angstrom. REF: M.Ceron, L.Melendez, S.Bernes, M.Arroyo, A.Ramirez-MonroyJ.Chem.Cryst. 4211192012

Compound Os\_3 (ECERIP01) has a ccd distance of 3.457(9) angstrom, a plane-plane angle (ppa) of 18.8(8) degrees , and a slippage of 0.499 angstrom. REF: M.Ceron, L.Melendez, S.Bernes, M.Arroyo, A.Ramirez-MonroyJ.Chem.Cryst. 4211192012

Compound Os\_4 (ECERIP01) has a ccd distance of 3.457(9) angstrom, a plane-plane angle (ppa) of 18.8(8) degrees , and a slippage of 0.745 angstrom. REF: M.Ceron, L.Melendez, S.Bernes, M.Arroyo, A.Ramirez-MonroyJ.Chem.Cryst. 4211192012

Compound Os\_5 (ECERIP01) has a ccd distance of 3.597(10) angstrom, a plane-plane angle (ppa) of 23.8(8) degrees , and a slippage of angstrom. REF: M.Ceron, L.Melendez, S.Bernes, M.Arroyo, A.Ramirez-MonroyJ.Chem.Cryst. 4211192012

Compound Os\_6 (ECERIP01) has a ccd distance of 3.598(10) angstrom, a plane-plane angle (ppa) of 23.8(8) degrees , and a slippage of angstrom. REF: M.Ceron, L.Melendez, S.Bernes, M.Arroyo, A.Ramirez-MonroyJ.Chem.Cryst. 4211192012

Compound Os\_7 (ERUHII) has a ccd distance of 3.960(3) angstrom, a plane-plane angle (ppa) of 29.8(2) degrees , and a slippage of angstrom. REF: M.Arroyo, S.Bernes, J.Ceron, J.Rius, H.TorrensInorg.Chem. 439862004

Compound Os\_8 (GENWOM) has a ccd distance of 3.464(6) angstrom, a plane-plane angle (ppa) of 13.0(5) degrees , and a slippage of 0.579 angstrom. REF: M.Ceron, M.Arroyo, S.BernesActa Crystallogr.,Sect.E:Struct.Rep.Online 62m21672006

Compound Os\_9 (HANGEI) has a ccd distance of 3.699(5) angstrom, a plane-plane angle (ppa) of 26.3(4) degrees , and a slippage of angstrom. REF: J.P.Collman, D.S.Bohle, A.K.PowellInorg.Chem. 3240041993

Compound Os\_10 (HANGEI) has a ccd distance of 3.699(5) angstrom, a plane-plane angle (ppa) of 26.3(4) degrees , and a slippage of angstrom. REF: J.P.Collman, D.S.Bohle, A.K.PowellInorg.Chem. 3240041993

Compound Os\_11 (HENXIH) has a ccd distance of 3.334(16) angstrom, a plane-plane angle (ppa) of 8 degrees , and a slippage of 0.981 angstrom. REF: M.Arroyo, J.A.Chamizo,

D.L.Hughes, R.L.Richards, P.Roman, P.Sosa, H.Torrens *J.Chem.Soc.,Dalton Trans.* 18191994

Compound Os\_12 (HENXIH) has a ccd distance of 3.334(16) angstrom, a plane-plane angle (ppa) of 8 degrees , and a slippage of 0.985 angstrom. REF: M.Arroyo, J.A.Chamizo, D.L.Hughes, R.L.Richards, P.Roman, P.Sosa, H.Torrens *J.Chem.Soc.,Dalton Trans.* 18191994

Compound Os\_13 (HENXIH01) has a ccd distance of 3.362(6) angstrom, a plane-plane angle (ppa) of 11.3(5) degrees , and a slippage of 1.114 angstrom. REF: P.Zeleny, M.Arroyo, L.Melendez, S.Bernes *IUCrData* 4x1916222019

Compound Os\_14 (HENXIH01) has a ccd distance of 3.363(6) angstrom, a plane-plane angle (ppa) of 11.3(5) degrees , and a slippage of 0.663 angstrom. REF: P.Zeleny, M.Arroyo, L.Melendez, S.Bernes *IUCrData* 4x1916222019

Compound Os\_15 (OQEHUO) has a ccd distance of 3.537(5) angstrom, a plane-plane angle (ppa) of 13.4(4) degrees , and a slippage of 1.135 angstrom. REF: M.Ceron, V.Cortina, A.Ramirez-Monroy, S.Bernes, H.Torrens, M.Arroyo *Polyhedron* 3012502011

Compound Os\_16 (OQEJAW) has a ccd distance of 3.778(4) angstrom, a plane-plane angle (ppa) of 12.1(3) degrees , and a slippage of 0.853 angstrom. REF: M.Ceron, V.Cortina, A.Ramirez-Monroy, S.Bernes, H.Torrens, M.Arroyo *Polyhedron* 3012502011

Compound Os\_17 (OQEJAW) has a ccd distance of 3.778(4) angstrom, a plane-plane angle (ppa) of 12.1(3) degrees , and a slippage of 0.186 angstrom. REF: M.Ceron, V.Cortina, A.Ramirez-Monroy, S.Bernes, H.Torrens, M.Arroyo *Polyhedron* 3012502011

Compound Os\_18 (ZAWWAV) has a ccd distance of 3.538(4) angstrom, a plane-plane angle (ppa) of 0.0(3) degrees , and a slippage of 1.154 angstrom. REF: F.Moreno-Esparza, H.Torrens, M.Arroyo, J.L.Brianso, C.Miratvilles, J.Rius *Polyhedron* 1416011995

Compound Os\_19 (ZAWWAV) has a ccd distance of 3.692(3) angstrom, a plane-plane angle (ppa) of 22.3(2) degrees , and a slippage of angstrom. REF: F.Moreno-Esparza, H.Torrens, M.Arroyo, J.L.Brianso, C.Miratvilles, J.Rius *Polyhedron* 1416011995

Compound Os\_20 (ZAWWAV) has a ccd distance of 3.712(3) angstrom, a plane-plane angle (ppa) of 24.5(2) degrees , and a slippage of angstrom. REF: F.Moreno-Esparza, H.Torrens, M.Arroyo, J.L.Brianso, C.Miratvilles, J.Rius *Polyhedron* 1416011995

Compound Os\_21 (ZAWWAV) has a ccd distance of 3.718(3) angstrom, a plane-plane angle (ppa) of 22.1(3) degrees , and a slippage of angstrom. REF: F.Moreno-Esparza, H.Torrens, M.Arroyo, J.L.Brianso, C.Miratvilles, J.Rius *Polyhedron* 1416011995

Compound Pb\_1 (CANWIA) has a ccd distance of 3.480(3) angstrom, a plane-plane angle (ppa) of 3.5(2) degrees , and a slippage of 1.066 angstrom. REF: R.P.Burwood, A.K.Cheetham *CSD Communication(Private Communication)* 2016

Compound Pb\_2 (CANWIA) has a ccd distance of 3.526(3) angstrom, a plane-plane angle (ppa) of 1.5(3) degrees , and a slippage of 1.121 angstrom. REF: R.P.Burwood, A.K.Cheetham *CSD Communication(Private Communication)* 2016

Compound Pb\_3 (CANWIA) has a ccd distance of 3.526(3) angstrom, a plane-plane angle (ppa) of 1.5(3) degrees , and a slippage of 1.167 angstrom. REF: R.P.Burwood, A.K.Cheetham *CSD Communication(Private Communication)* 2016

Compound Pd\_1 (GUQBUQ) has a ccd distance of 3.5743(14) angstrom, a plane-plane angle (ppa) of .02(11) degrees , and a slippage of 1.123 angstrom. REF: M.Basauri-Molina,

S.Hernandez-Ortega, R.A.Toscano, J.Valdes-Martinez, D.Morales-Morales  
Inorg.Chim.Acta 36312222010

Compound Pd\_2 (HIHREX) has a ccd distance of 3.451(3) angstrom, a plane-plane angle (ppa) of 5.7(2) degrees , and a slippage of 0.671 angstrom. REF: Verena Lingen, Anna Luning, C.Strau, Ingo Pantenburg, G.B.Deacon, A.Klein, G.MeyerEur.J.Inorg.Chem. 44502013

Compound Pd\_3 (HIHREX) has a ccd distance of 3.451(3) angstrom, a plane-plane angle (ppa) of 5.7(2) degrees , and a slippage of 0.337 angstrom. REF: Verena Lingen, Anna Luning, C.Strau, Ingo Pantenburg, G.B.Deacon, A.Klein, G.MeyerEur.J.Inorg.Chem. 44502013

Compound Pd\_4 (HIHREX) has a ccd distance of 3.488(3) angstrom, a plane-plane angle (ppa) of 0.0(2) degrees , and a slippage of 0.946 angstrom. REF: Verena Lingen, Anna Luning, C.Strau, Ingo Pantenburg, G.B.Deacon, A.Klein, G.MeyerEur.J.Inorg.Chem. 44502013

Compound Pd\_5 (HIHREX) has a ccd distance of 3.502(3) angstrom, a plane-plane angle (ppa) of 5.7(3) degrees , and a slippage of 1.049 angstrom. REF: Verena Lingen, Anna Luning, C.Strau, Ingo Pantenburg, G.B.Deacon, A.Klein, G.MeyerEur.J.Inorg.Chem. 44502013

Compound Pd\_6 (HIHREX) has a ccd distance of 3.503(3) angstrom, a plane-plane angle (ppa) of 5.7(3) degrees , and a slippage of 0.974 angstrom. REF: Verena Lingen, Anna Luning, C.Strau, Ingo Pantenburg, G.B.Deacon, A.Klein, G.MeyerEur.J.Inorg.Chem. 44502013

Compound Pd\_7 (HIHREX) has a ccd distance of 3.525(2) angstrom, a plane-plane angle (ppa) of .72(16) degrees , and a slippage of 0.443 angstrom. REF: Verena Lingen, Anna Luning, C.Strau, Ingo Pantenburg, G.B.Deacon, A.Klein, G.MeyerEur.J.Inorg.Chem. 44502013

Compound Pd\_8 (HIHREX) has a ccd distance of 3.525(2) angstrom, a plane-plane angle (ppa) of .72(16) degrees , and a slippage of 0.284 angstrom. REF: Verena Lingen, Anna Luning, C.Strau, Ingo Pantenburg, G.B.Deacon, A.Klein, G.MeyerEur.J.Inorg.Chem. 44502013

Compound Pd\_9 (HIHREX) has a ccd distance of 3.553(3) angstrom, a plane-plane angle (ppa) of 4.8(2) degrees , and a slippage of 1.083 angstrom. REF: Verena Lingen, Anna Luning, C.Strau, Ingo Pantenburg, G.B.Deacon, A.Klein, G.MeyerEur.J.Inorg.Chem. 44502013

Compound Pd\_10 (HIHREX) has a ccd distance of 3.606(2) angstrom, a plane-plane angle (ppa) of .37(15) degrees , and a slippage of 0.808 angstrom. REF: Verena Lingen, Anna Luning, C.Strau, Ingo Pantenburg, G.B.Deacon, A.Klein, G.MeyerEur.J.Inorg.Chem. 44502013

Compound Pd\_11 (HIHREX) has a ccd distance of 3.606(2) angstrom, a plane-plane angle (ppa) of .37(15) degrees , and a slippage of 0.831 angstrom. REF: Verena Lingen, Anna Luning, C.Strau, Ingo Pantenburg, G.B.Deacon, A.Klein, G.MeyerEur.J.Inorg.Chem. 44502013

Compound Pd\_12 (HIHREX) has a ccd distance of 3.613(2) angstrom, a plane-plane angle (ppa) of .22(17) degrees , and a slippage of 0.331 angstrom. REF: Verena Lingen, Anna Luning, C.Strau, Ingo Pantenburg, G.B.Deacon, A.Klein, G.MeyerEur.J.Inorg.Chem. 44502013

Compound Pd\_13 (HIHREX) has a ccd distance of 3.613(2) angstrom, a plane-plane angle (ppa) of .22(17) degrees , and a slippage of 0.344 angstrom. REF: Verena Lingen, Anna Luning, C.Strau, Ingo Pantenburg, G.B.Deacon, A.Klein, G.MeyerEur.J.Inorg.Chem. 44502013

Compound Pd\_14 (HIHREX) has a ccd distance of 3.651(2) angstrom, a plane-plane angle (ppa) of .04(13) degrees , and a slippage of 0.636 angstrom. REF: Verena Lingen, Anna Luning, C.Strau, Ingo Pantenburg, G.B.Deacon, A.Klein, G.MeyerEur.J.Inorg.Chem. 44502013

Compound Pd\_15 (HIHREX) has a ccd distance of 3.652(3) angstrom, a plane-plane angle (ppa) of 0.3(2) degrees , and a slippage of 0.645 angstrom. REF: Verena Lingen, Anna Luning, C.Strau, Ingo Pantenburg, G.B.Deacon, A.Klein, G.MeyerEur.J.Inorg.Chem. 44502013

Compound Pd\_16 (HIHREX) has a ccd distance of 3.652(3) angstrom, a plane-plane angle (ppa) of 0.3(2) degrees , and a slippage of 0.648 angstrom. REF: Verena Lingen, Anna Luning, C.Strau, Ingo Pantenburg, G.B.Deacon, A.Klein, G.MeyerEur.J.Inorg.Chem. 44502013

Compound Pd\_17 (HIHREX) has a ccd distance of 3.679(3) angstrom, a plane-plane angle (ppa) of 1.1(2) degrees , and a slippage of 1.034 angstrom. REF: Verena Lingen, Anna Luning, C.Strau, Ingo Pantenburg, G.B.Deacon, A.Klein, G.MeyerEur.J.Inorg.Chem. 44502013

Compound Pd\_18 (HIHREX) has a ccd distance of 3.679(3) angstrom, a plane-plane angle (ppa) of 1.1(2) degrees , and a slippage of 1.056 angstrom. REF: Verena Lingen, Anna Luning, C.Strau, Ingo Pantenburg, G.B.Deacon, A.Klein, G.MeyerEur.J.Inorg.Chem. 44502013

Compound Pd\_19 (HIHREX) has a ccd distance of 3.686(2) angstrom, a plane-plane angle (ppa) of .61(18) degrees , and a slippage of 0.815 angstrom. REF: Verena Lingen, Anna Luning, C.Strau, Ingo Pantenburg, G.B.Deacon, A.Klein, G.MeyerEur.J.Inorg.Chem. 44502013

Compound Pd\_20 (HIHREX) has a ccd distance of 3.686(2) angstrom, a plane-plane angle (ppa) of .61(18) degrees , and a slippage of 0.838 angstrom. REF: Verena Lingen, Anna Luning, C.Strau, Ingo Pantenburg, G.B.Deacon, A.Klein, G.MeyerEur.J.Inorg.Chem. 44502013

Compound Pd\_21 (HIHREX) has a ccd distance of 3.706(2) angstrom, a plane-plane angle (ppa) of .27(12) degrees , and a slippage of 0.907 angstrom. REF: Verena Lingen, Anna Luning, C.Strau, Ingo Pantenburg, G.B.Deacon, A.Klein, G.MeyerEur.J.Inorg.Chem. 44502013

Compound Pd\_22 (HIHREX) has a ccd distance of 3.706(2) angstrom, a plane-plane angle (ppa) of .27(12) degrees , and a slippage of 0.9 angstrom. REF: Verena Lingen, Anna Luning, C.Strau, Ingo Pantenburg, G.B.Deacon, A.Klein, G.MeyerEur.J.Inorg.Chem. 44502013

Compound Pd\_23 (HIHREX) has a ccd distance of 3.713(3) angstrom, a plane-plane angle (ppa) of 2.3(2) degrees , and a slippage of 1.214 angstrom. REF: Verena Lingen, Anna Luning, C.Strau, Ingo Pantenburg, G.B.Deacon, A.Klein, G.MeyerEur.J.Inorg.Chem. 44502013

Compound Pd\_24 (HIHREX) has a ccd distance of 3.736(3) angstrom, a plane-plane angle (ppa) of 3.3(2) degrees , and a slippage of 1.281 angstrom. REF: Verena Lingen, Anna

Luning, C.Strau, Ingo Pantenburg, G.B.Deacon, A.Klein, G.MeyerEur.J.Inorg.Chem. 44502013

Compound Pd\_25 (HIHREX) has a ccd distance of 3.756(3) angstrom, a plane-plane angle (ppa) of .17(19) degrees , and a slippage of 1.228 angstrom. REF: Verena Lingen, Anna Luning, C.Strau, Ingo Pantenburg, G.B.Deacon, A.Klein, G.MeyerEur.J.Inorg.Chem. 44502013

Compound Pd\_26 (HIHREX) has a ccd distance of 3.800(2) angstrom, a plane-plane angle (ppa) of .07(18) degrees , and a slippage of 1.23 angstrom. REF: Verena Lingen, Anna Luning, C.Strau, Ingo Pantenburg, G.B.Deacon, A.Klein, G.MeyerEur.J.Inorg.Chem. 44502013

Compound Pd\_27 (HIHREX) has a ccd distance of 3.800(2) angstrom, a plane-plane angle (ppa) of .07(18) degrees , and a slippage of 1.227 angstrom. REF: Verena Lingen, Anna Luning, C.Strau, Ingo Pantenburg, G.B.Deacon, A.Klein, G.MeyerEur.J.Inorg.Chem. 44502013

Compound Pd\_28 (HIHROH) has a ccd distance of 3.521(6) angstrom, a plane-plane angle (ppa) of 5.1(5) degrees , and a slippage of 0.547 angstrom. REF: Verena Lingen, Anna Luning, C.Strau, Ingo Pantenburg, G.B.Deacon, A.Klein, G.MeyerEur.J.Inorg.Chem. 44502013

Compound Pd\_29 (HIHROH) has a ccd distance of 3.521(6) angstrom, a plane-plane angle (ppa) of 5.1(5) degrees , and a slippage of 0.275 angstrom. REF: Verena Lingen, Anna Luning, C.Strau, Ingo Pantenburg, G.B.Deacon, A.Klein, G.MeyerEur.J.Inorg.Chem. 44502013

Compound Pd\_30 (HIHROH) has a ccd distance of 3.586(8) angstrom, a plane-plane angle (ppa) of 0.0(6) degrees , and a slippage of 1.167 angstrom. REF: Verena Lingen, Anna Luning, C.Strau, Ingo Pantenburg, G.B.Deacon, A.Klein, G.MeyerEur.J.Inorg.Chem. 44502013

Compound Pd\_31 (HIHROH) has a ccd distance of 3.605(9) angstrom, a plane-plane angle (ppa) of 9.6(7) degrees , and a slippage of 1.01 angstrom. REF: Verena Lingen, Anna Luning, C.Strau, Ingo Pantenburg, G.B.Deacon, A.Klein, G.MeyerEur.J.Inorg.Chem. 44502013

Compound Pd\_32 (HIHROH) has a ccd distance of 3.606(9) angstrom, a plane-plane angle (ppa) of 9.6(7) degrees , and a slippage of 0.422 angstrom. REF: Verena Lingen, Anna Luning, C.Strau, Ingo Pantenburg, G.B.Deacon, A.Klein, G.MeyerEur.J.Inorg.Chem. 44502013

Compound Pd\_33 (HIHROH) has a ccd distance of 3.631(8) angstrom, a plane-plane angle (ppa) of 7.7(7) degrees , and a slippage of 1.212 angstrom. REF: Verena Lingen, Anna Luning, C.Strau, Ingo Pantenburg, G.B.Deacon, A.Klein, G.MeyerEur.J.Inorg.Chem. 44502013

Compound Pd\_34 (HIHROH) has a ccd distance of 3.632(8) angstrom, a plane-plane angle (ppa) of 7.7(7) degrees , and a slippage of 0.79 angstrom. REF: Verena Lingen, Anna Luning, C.Strau, Ingo Pantenburg, G.B.Deacon, A.Klein, G.MeyerEur.J.Inorg.Chem. 44502013

Compound Pd\_35 (HIHROH) has a ccd distance of 3.639(7) angstrom, a plane-plane angle (ppa) of 5.3(5) degrees , and a slippage of 1.131 angstrom. REF: Verena Lingen, Anna Luning, C.Strau, Ingo Pantenburg, G.B.Deacon, A.Klein, G.MeyerEur.J.Inorg.Chem. 44502013



Compound Pd\_36 (HIHROH) has a ccd distance of 3.639(7) angstrom, a plane-plane angle (ppa) of 5.3(5) degrees , and a slippage of 0.933 angstrom. REF: Verena Lingen, Anna Luning, C.Strau, Ingo Pantenburg, G.B.Deacon, A.Klein, G.MeyerEur.J.Inorg.Chem. 44502013

Compound Pd\_37 (HIHROH) has a ccd distance of 3.650(7) angstrom, a plane-plane angle (ppa) of 5.8(5) degrees , and a slippage of 0.991 angstrom. REF: Verena Lingen, Anna Luning, C.Strau, Ingo Pantenburg, G.B.Deacon, A.Klein, G.MeyerEur.J.Inorg.Chem. 44502013

Compound Pd\_38 (HIHROH) has a ccd distance of 3.678(6) angstrom, a plane-plane angle (ppa) of 6.3(4) degrees , and a slippage of 0.925 angstrom. REF: Verena Lingen, Anna Luning, C.Strau, Ingo Pantenburg, G.B.Deacon, A.Klein, G.MeyerEur.J.Inorg.Chem. 44502013

Compound Pd\_39 (HIHROH) has a ccd distance of 3.697(5) angstrom, a plane-plane angle (ppa) of 4.7(3) degrees , and a slippage of 1.077 angstrom. REF: Verena Lingen, Anna Luning, C.Strau, Ingo Pantenburg, G.B.Deacon, A.Klein, G.MeyerEur.J.Inorg.Chem. 44502013

Compound Pd\_40 (HIHROH) has a ccd distance of 3.698(6) angstrom, a plane-plane angle (ppa) of 5.5(3) degrees , and a slippage of 1.142 angstrom. REF: Verena Lingen, Anna Luning, C.Strau, Ingo Pantenburg, G.B.Deacon, A.Klein, G.MeyerEur.J.Inorg.Chem. 44502013

Compound Pd\_41 (HIHROH) has a ccd distance of 3.722(7) angstrom, a plane-plane angle (ppa) of 5.4(6) degrees , and a slippage of 1.064 angstrom. REF: Verena Lingen, Anna Luning, C.Strau, Ingo Pantenburg, G.B.Deacon, A.Klein, G.MeyerEur.J.Inorg.Chem. 44502013

Compound Pd\_42 (HIHROH) has a ccd distance of 3.733(6) angstrom, a plane-plane angle (ppa) of 5.4(4) degrees , and a slippage of 1.181 angstrom. REF: Verena Lingen, Anna Luning, C.Strau, Ingo Pantenburg, G.B.Deacon, A.Klein, G.MeyerEur.J.Inorg.Chem. 44502013

Compound Pd\_43 (HIHROH) has a ccd distance of 3.735(7) angstrom, a plane-plane angle (ppa) of 6.5(6) degrees , and a slippage of 1.278 angstrom. REF: Verena Lingen, Anna Luning, C.Strau, Ingo Pantenburg, G.B.Deacon, A.Klein, G.MeyerEur.J.Inorg.Chem. 44502013

Compound Pd\_44 (HIHROH) has a ccd distance of 3.736(7) angstrom, a plane-plane angle (ppa) of 6.9(6) degrees , and a slippage of 1.186 angstrom. REF: Verena Lingen, Anna Luning, C.Strau, Ingo Pantenburg, G.B.Deacon, A.Klein, G.MeyerEur.J.Inorg.Chem. 44502013

Compound Pd\_45 (HIHRUN) has a ccd distance of 3.472(3) angstrom, a plane-plane angle (ppa) of 0.9(2) degrees , and a slippage of 0.674 angstrom. REF: Verena Lingen, Anna Luning, C.Strau, Ingo Pantenburg, G.B.Deacon, A.Klein, G.MeyerEur.J.Inorg.Chem. 44502013

Compound Pd\_46 (HIHRUN) has a ccd distance of 3.472(3) angstrom, a plane-plane angle (ppa) of 0.9(2) degrees , and a slippage of 0.724 angstrom. REF: Verena Lingen, Anna Luning, C.Strau, Ingo Pantenburg, G.B.Deacon, A.Klein, G.MeyerEur.J.Inorg.Chem. 44502013

Compound Pd\_47 (HIHRUN) has a ccd distance of 3.497(2) angstrom, a plane-plane angle (ppa) of .00(18) degrees , and a slippage of 0.722 angstrom. REF: Verena Lingen, Anna

Luning, C.Strau, Ingo Pantenburg, G.B.Deacon, A.Klein, G.MeyerEur.J.Inorg.Chem. 44502013

Compound Pd\_48 (HIHSAU) has a ccd distance of 3.468(6) angstrom, a plane-plane angle (ppa) of 7.3(5) degrees , and a slippage of 1.124 angstrom. REF: Verena Lingen, Anna Luning, C.Strau, Ingo Pantenburg, G.B.Deacon, A.Klein, G.MeyerEur.J.Inorg.Chem. 44502013

Compound Pd\_49 (HIHSAU) has a ccd distance of 3.469(6) angstrom, a plane-plane angle (ppa) of 7.3(5) degrees , and a slippage of 0.702 angstrom. REF: Verena Lingen, Anna Luning, C.Strau, Ingo Pantenburg, G.B.Deacon, A.Klein, G.MeyerEur.J.Inorg.Chem. 44502013

Compound Pd\_50 (HIHSAU) has a ccd distance of 3.494(4) angstrom, a plane-plane angle (ppa) of 1.4(3) degrees , and a slippage of 0.802 angstrom. REF: Verena Lingen, Anna Luning, C.Strau, Ingo Pantenburg, G.B.Deacon, A.Klein, G.MeyerEur.J.Inorg.Chem. 44502013

Compound Pd\_51 (HIHSAU) has a ccd distance of 3.495(4) angstrom, a plane-plane angle (ppa) of 1.4(3) degrees , and a slippage of 0.855 angstrom. REF: Verena Lingen, Anna Luning, C.Strau, Ingo Pantenburg, G.B.Deacon, A.Klein, G.MeyerEur.J.Inorg.Chem. 44502013

Compound Pd\_52 (HIHSAU) has a ccd distance of 3.909(5) angstrom, a plane-plane angle (ppa) of 0.0(5) degrees , and a slippage of 1.313 angstrom. REF: Verena Lingen, Anna Luning, C.Strau, Ingo Pantenburg, G.B.Deacon, A.Klein, G.MeyerEur.J.Inorg.Chem. 44502013

Compound Pd\_53 (MADJAD) has a ccd distance of 3.280(2) angstrom, a plane-plane angle (ppa) of 1.3(2) degrees , and a slippage of 0.051 angstrom. REF: C.Herrera-Alvarez, V.Gomez-Benitez, R.Redon, J.J.Garcia, S.Hernandez-Ortega, R.A.Toscano, D.Morales-MoralesJ.Organomet.Chem. 68924642004

Compound Pd\_54 (MADJAD) has a ccd distance of 3.280(2) angstrom, a plane-plane angle (ppa) of 1.3(2) degrees , and a slippage of 0.022 angstrom. REF: C.Herrera-Alvarez, V.Gomez-Benitez, R.Redon, J.J.Garcia, S.Hernandez-Ortega, R.A.Toscano, D.Morales-MoralesJ.Organomet.Chem. 68924642004

Compound Pt\_1 (BIGXOF) has a ccd distance of 3.616(7) angstrom, a plane-plane angle (ppa) of 0.0(6) degrees , and a slippage of 1.178 angstrom. REF: L.Villanueva, M.Arroyo, S.Bernes, H.TorrensChem.Comm. 19422004

Compound Pt\_2 (BIGXUL) has a ccd distance of 3.441(4) angstrom, a plane-plane angle (ppa) of 0.0(4) degrees , and a slippage of 0.788 angstrom. REF: L.Villanueva, M.Arroyo, S.Bernes, H.TorrensChem.Comm. 19422004

Compound Pt\_3 (BOQHOG) has a ccd distance of 3.586(3) angstrom, a plane-plane angle (ppa) of 12.6(3) degrees , and a slippage of 0.585 angstrom. REF: Verena Lingen, Anna Luning, C.Strau, Ingo Pantenburg, G.B.Deacon, G.Meyer, A.KleinInorg.Chim.Acta 423a1522014

Compound Pt\_4 (BOQJEY) has a ccd distance of 3.634(6) angstrom, a plane-plane angle (ppa) of 22.7(5) degrees , and a slippage of angstrom. REF: Verena Lingen, Anna Luning, C.Strau, Ingo Pantenburg, G.B.Deacon, G.Meyer, A.KleinInorg.Chim.Acta 423a1522014

Compound Pt\_5 (BOQJEY) has a ccd distance of 3.635(6) angstrom, a plane-plane angle (ppa) of 22.7(5) degrees , and a slippage of angstrom. REF: Verena Lingen, Anna Luning, C.Strau, Ingo Pantenburg, G.B.Deacon, G.Meyer, A.KleinInorg.Chim.Acta 423a1522014

Compound Pt\_6 (FOKSUV) has a ccd distance of 3.576(3) angstrom, a plane-plane angle (ppa) of 13.2(3) degrees , and a slippage of 0.621 angstrom. REF: S.E.Castillo-Blum, M.Flores-Alamo, D.Franco-Bodek, G.Hernandez, H.TorrensInorg.Chem.Commun. 45442014

Compound Pt\_7 (FOKSUV) has a ccd distance of 3.576(3) angstrom, a plane-plane angle (ppa) of 13.2(3) degrees , and a slippage of 0.956 angstrom. REF: S.E.Castillo-Blum, M.Flores-Alamo, D.Franco-Bodek, G.Hernandez, H.TorrensInorg.Chem.Commun. 45442014

Compound Pt\_8 (FOKSUV) has a ccd distance of 3.679(4) angstrom, a plane-plane angle (ppa) of 12.5(3) degrees , and a slippage of 1.237 angstrom. REF: S.E.Castillo-Blum, M.Flores-Alamo, D.Franco-Bodek, G.Hernandez, H.TorrensInorg.Chem.Commun. 45442014

Compound Pt\_9 (FOKSUV) has a ccd distance of 3.679(4) angstrom, a plane-plane angle (ppa) of 12.5(3) degrees , and a slippage of 0.475 angstrom. REF: S.E.Castillo-Blum, M.Flores-Alamo, D.Franco-Bodek, G.Hernandez, H.TorrensInorg.Chem.Commun. 45442014

Compound Pt\_10 (FOKSUV) has a ccd distance of 3.874(4) angstrom, a plane-plane angle (ppa) of 37.3(4) degrees , and a slippage of angstrom. REF: S.E.Castillo-Blum, M.Flores-Alamo, D.Franco-Bodek, G.Hernandez, H.TorrensInorg.Chem.Commun. 45442014

Compound Pt\_11 (FOKSUV) has a ccd distance of 3.983(4) angstrom, a plane-plane angle (ppa) of 38.1(3) degrees , and a slippage of angstrom. REF: S.E.Castillo-Blum, M.Flores-Alamo, D.Franco-Bodek, G.Hernandez, H.TorrensInorg.Chem.Commun. 45442014

Compound Pt\_12 (FORMUW) has a ccd distance of 3.679(12) angstrom, a plane-plane angle (ppa) of 7.5(9) degrees , and a slippage of 1.161 angstrom. REF: R.Cervantes, J.Tiburcio, H.TorrensNew J.Chem. 396312015

Compound Pt\_13 (LUQMUI) has a ccd distance of 3.447(3) angstrom, a plane-plane angle (ppa) of 6.0(3) degrees , and a slippage of 0.244 angstrom. REF: G.Backman-Blanco, H.Valdes, M.T.Ramirez-Apan, P.Cano-Sanchez, S.Hernandez-Ortega, A.L.Orjuela, J.Ali-Torres, A.Flores-Gaspar, R.Reyes-Martinez, D.Morales-MoralesJ.Inorg.Biochem. 2111112062020

Compound Pt\_14 (LUQMUI) has a ccd distance of 3.447(3) angstrom, a plane-plane angle (ppa) of 6.0(3) degrees , and a slippage of 0.602 angstrom. REF: G.Backman-Blanco, H.Valdes, M.T.Ramirez-Apan, P.Cano-Sanchez, S.Hernandez-Ortega, A.L.Orjuela, J.Ali-Torres, A.Flores-Gaspar, R.Reyes-Martinez, D.Morales-MoralesJ.Inorg.Biochem. 2111112062020

Compound Pt\_15 (LUQMUI) has a ccd distance of 3.492(3) angstrom, a plane-plane angle (ppa) of 0.0(2) degrees , and a slippage of 0.895 angstrom. REF: G.Backman-Blanco, H.Valdes, M.T.Ramirez-Apan, P.Cano-Sanchez, S.Hernandez-Ortega, A.L.Orjuela, J.Ali-Torres, A.Flores-Gaspar, R.Reyes-Martinez, D.Morales-MoralesJ.Inorg.Biochem. 2111112062020

Compound Pt\_16 (LUQMUI) has a ccd distance of 3.508(4) angstrom, a plane-plane angle (ppa) of 6.2(3) degrees , and a slippage of 0.965 angstrom. REF: G.Backman-Blanco, H.Valdes, M.T.Ramirez-Apan, P.Cano-Sanchez, S.Hernandez-Ortega, A.L.Orjuela, J.Ali-Torres, A.Flores-Gaspar, R.Reyes-Martinez, D.Morales-MoralesJ.Inorg.Biochem. 2111112062020

Compound Pt\_17 (LUQMUI) has a ccd distance of 3.509(4) angstrom, a plane-plane angle (ppa) of 6.2(3) degrees , and a slippage of 1.047 angstrom. REF: G.Backman-Blanco,

H.Valdes, M.T.Ramirez-Apan, P.Cano-Sanchez, S.Hernandez-Ortega, A.L.Orjuela, J.Ali-Torres, A.Flores-Gaspar, R.Reyes-Martinez, D.Morales-MoralesJ.Inorg.Biochem. 2111112062020

Compound Pt\_18 (LUQMUI) has a ccd distance of 3.546(3) angstrom, a plane-plane angle (ppa) of 4.6(2) degrees , and a slippage of 1.11 angstrom. REF: G.Backman-Blanco, H.Valdes, M.T.Ramirez-Apan, P.Cano-Sanchez, S.Hernandez-Ortega, A.L.Orjuela, J.Ali-Torres, A.Flores-Gaspar, R.Reyes-Martinez, D.Morales-MoralesJ.Inorg.Biochem. 2111112062020

Compound Pt\_19 (LUQMUI) has a ccd distance of 3.580(2) angstrom, a plane-plane angle (ppa) of .13(17) degrees , and a slippage of 0.642 angstrom. REF: G.Backman-Blanco, H.Valdes, M.T.Ramirez-Apan, P.Cano-Sanchez, S.Hernandez-Ortega, A.L.Orjuela, J.Ali-Torres, A.Flores-Gaspar, R.Reyes-Martinez, D.Morales-MoralesJ.Inorg.Biochem. 2111112062020

Compound Pt\_20 (LUQMUI) has a ccd distance of 3.580(2) angstrom, a plane-plane angle (ppa) of .13(17) degrees , and a slippage of 0.512 angstrom. REF: G.Backman-Blanco, H.Valdes, M.T.Ramirez-Apan, P.Cano-Sanchez, S.Hernandez-Ortega, A.L.Orjuela, J.Ali-Torres, A.Flores-Gaspar, R.Reyes-Martinez, D.Morales-MoralesJ.Inorg.Biochem. 2111112062020

Compound Pt\_21 (LUQMUI) has a ccd distance of 3.623(2) angstrom, a plane-plane angle (ppa) of .81(15) degrees , and a slippage of 0.802 angstrom. REF: G.Backman-Blanco, H.Valdes, M.T.Ramirez-Apan, P.Cano-Sanchez, S.Hernandez-Ortega, A.L.Orjuela, J.Ali-Torres, A.Flores-Gaspar, R.Reyes-Martinez, D.Morales-MoralesJ.Inorg.Biochem. 2111112062020

Compound Pt\_22 (LUQMUI) has a ccd distance of 3.623(2) angstrom, a plane-plane angle (ppa) of .81(15) degrees , and a slippage of 0.786 angstrom. REF: G.Backman-Blanco, H.Valdes, M.T.Ramirez-Apan, P.Cano-Sanchez, S.Hernandez-Ortega, A.L.Orjuela, J.Ali-Torres, A.Flores-Gaspar, R.Reyes-Martinez, D.Morales-MoralesJ.Inorg.Biochem. 2111112062020

Compound Pt\_23 (LUQMUI) has a ccd distance of 3.629(3) angstrom, a plane-plane angle (ppa) of .34(19) degrees , and a slippage of 0.426 angstrom. REF: G.Backman-Blanco, H.Valdes, M.T.Ramirez-Apan, P.Cano-Sanchez, S.Hernandez-Ortega, A.L.Orjuela, J.Ali-Torres, A.Flores-Gaspar, R.Reyes-Martinez, D.Morales-MoralesJ.Inorg.Biochem. 2111112062020

Compound Pt\_24 (LUQMUI) has a ccd distance of 3.629(3) angstrom, a plane-plane angle (ppa) of .34(19) degrees , and a slippage of 0.41 angstrom. REF: G.Backman-Blanco, H.Valdes, M.T.Ramirez-Apan, P.Cano-Sanchez, S.Hernandez-Ortega, A.L.Orjuela, J.Ali-Torres, A.Flores-Gaspar, R.Reyes-Martinez, D.Morales-MoralesJ.Inorg.Biochem. 2111112062020

Compound Pt\_25 (LUQMUI) has a ccd distance of 3.650(3) angstrom, a plane-plane angle (ppa) of 0.8(2) degrees , and a slippage of 0.612 angstrom. REF: G.Backman-Blanco, H.Valdes, M.T.Ramirez-Apan, P.Cano-Sanchez, S.Hernandez-Ortega, A.L.Orjuela, J.Ali-Torres, A.Flores-Gaspar, R.Reyes-Martinez, D.Morales-MoralesJ.Inorg.Biochem. 2111112062020

Compound Pt\_26 (LUQMUI) has a ccd distance of 3.651(3) angstrom, a plane-plane angle (ppa) of 0.8(2) degrees , and a slippage of 0.585 angstrom. REF: G.Backman-Blanco, H.Valdes, M.T.Ramirez-Apan, P.Cano-Sanchez, S.Hernandez-Ortega, A.L.Orjuela, J.Ali-

Torres, A.Flores-Gaspar, R.Reyes-Martinez, D.Morales-MoralesJ.Inorg.Biochem. 2111112062020

Compound Pt\_27 (LUQMUI) has a ccd distance of 3.651(2) angstrom, a plane-plane angle (ppa) of .00(15) degrees , and a slippage of 0.586 angstrom. REF: G.Backman-Blanco, H.Valdes, M.T.Ramirez-Apan, P.Cano-Sanchez, S.Hernandez-Ortega, A.L.Orjuela, J.Ali-Torres, A.Flores-Gaspar, R.Reyes-Martinez, D.Morales-MoralesJ.Inorg.Biochem. 2111112062020

Compound Pt\_28 (LUQMUI) has a ccd distance of 3.688(3) angstrom, a plane-plane angle (ppa) of 0.8(2) degrees , and a slippage of 0.768 angstrom. REF: G.Backman-Blanco, H.Valdes, M.T.Ramirez-Apan, P.Cano-Sanchez, S.Hernandez-Ortega, A.L.Orjuela, J.Ali-Torres, A.Flores-Gaspar, R.Reyes-Martinez, D.Morales-MoralesJ.Inorg.Biochem. 2111112062020

Compound Pt\_29 (LUQMUI) has a ccd distance of 3.688(3) angstrom, a plane-plane angle (ppa) of 0.8(2) degrees , and a slippage of 0.81 angstrom. REF: G.Backman-Blanco, H.Valdes, M.T.Ramirez-Apan, P.Cano-Sanchez, S.Hernandez-Ortega, A.L.Orjuela, J.Ali-Torres, A.Flores-Gaspar, R.Reyes-Martinez, D.Morales-MoralesJ.Inorg.Biochem. 2111112062020

Compound Pt\_30 (LUQMUI) has a ccd distance of 3.701(2) angstrom, a plane-plane angle (ppa) of .21(13) degrees , and a slippage of 0.848 angstrom. REF: G.Backman-Blanco, H.Valdes, M.T.Ramirez-Apan, P.Cano-Sanchez, S.Hernandez-Ortega, A.L.Orjuela, J.Ali-Torres, A.Flores-Gaspar, R.Reyes-Martinez, D.Morales-MoralesJ.Inorg.Biochem. 2111112062020

Compound Pt\_31 (LUQMUI) has a ccd distance of 3.701(2) angstrom, a plane-plane angle (ppa) of .21(13) degrees , and a slippage of 0.842 angstrom. REF: G.Backman-Blanco, H.Valdes, M.T.Ramirez-Apan, P.Cano-Sanchez, S.Hernandez-Ortega, A.L.Orjuela, J.Ali-Torres, A.Flores-Gaspar, R.Reyes-Martinez, D.Morales-MoralesJ.Inorg.Biochem. 2111112062020

Compound Pt\_32 (LUQMUI) has a ccd distance of 3.729(3) angstrom, a plane-plane angle (ppa) of 1.1(2) degrees , and a slippage of 1.141 angstrom. REF: G.Backman-Blanco, H.Valdes, M.T.Ramirez-Apan, P.Cano-Sanchez, S.Hernandez-Ortega, A.L.Orjuela, J.Ali-Torres, A.Flores-Gaspar, R.Reyes-Martinez, D.Morales-MoralesJ.Inorg.Biochem. 2111112062020

Compound Pt\_33 (LUQMUI) has a ccd distance of 3.729(3) angstrom, a plane-plane angle (ppa) of 1.1(2) degrees , and a slippage of 1.126 angstrom. REF: G.Backman-Blanco, H.Valdes, M.T.Ramirez-Apan, P.Cano-Sanchez, S.Hernandez-Ortega, A.L.Orjuela, J.Ali-Torres, A.Flores-Gaspar, R.Reyes-Martinez, D.Morales-MoralesJ.Inorg.Biochem. 2111112062020

Compound Pt\_34 (LUQMUI) has a ccd distance of 3.785(3) angstrom, a plane-plane angle (ppa) of .03(19) degrees , and a slippage of 1.287 angstrom. REF: G.Backman-Blanco, H.Valdes, M.T.Ramirez-Apan, P.Cano-Sanchez, S.Hernandez-Ortega, A.L.Orjuela, J.Ali-Torres, A.Flores-Gaspar, R.Reyes-Martinez, D.Morales-MoralesJ.Inorg.Biochem. 2111112062020

Compound Pt\_35 (LUQMUI) has a ccd distance of 3.820(3) angstrom, a plane-plane angle (ppa) of 0.3(2) degrees , and a slippage of 1.283 angstrom. REF: G.Backman-Blanco, H.Valdes, M.T.Ramirez-Apan, P.Cano-Sanchez, S.Hernandez-Ortega, A.L.Orjuela, J.Ali-Torres, A.Flores-Gaspar, R.Reyes-Martinez, D.Morales-MoralesJ.Inorg.Biochem. 2111112062020

Compound Pt\_36 (LUQMUI) has a ccd distance of 3.820(3) angstrom, a plane-plane angle (ppa) of 0.3(2) degrees , and a slippage of 1.265 angstrom. REF: G.Backman-Blanco, H.Valdes, M.T.Ramirez-Apan, P.Cano-Sanchez, S.Hernandez-Ortega, A.L.Orjuela, J.Ali-Torres, A.Flores-Gaspar, R.Reyes-Martinez, D.Morales-Morales *J.Inorg.Biochem.* 2111112062020

Compound Pt\_37 (MIXFAB) has a ccd distance of 3.478(3) angstrom, a plane-plane angle (ppa) of 7.1(3) degrees , and a slippage of 0.749 angstrom. REF: M.Corona-Rodriguez, S.Hernandez-Ortega, J.Valdes-Martinez, D.Morales-Morales *Supramol.Chem.* 195792007

Compound Pt\_38 (MIXFAB) has a ccd distance of 3.478(3) angstrom, a plane-plane angle (ppa) of 7.1(3) degrees , and a slippage of 1.162 angstrom. REF: M.Corona-Rodriguez, S.Hernandez-Ortega, J.Valdes-Martinez, D.Morales-Morales *Supramol.Chem.* 195792007

Compound Pt\_39 (MIXFAB) has a ccd distance of 3.514(2) angstrom, a plane-plane angle (ppa) of .68(19) degrees , and a slippage of 0.822 angstrom. REF: M.Corona-Rodriguez, S.Hernandez-Ortega, J.Valdes-Martinez, D.Morales-Morales *Supramol.Chem.* 195792007

Compound Pt\_40 (MIXFAB) has a ccd distance of 3.515(2) angstrom, a plane-plane angle (ppa) of .68(19) degrees , and a slippage of 0.862 angstrom. REF: M.Corona-Rodriguez, S.Hernandez-Ortega, J.Valdes-Martinez, D.Morales-Morales *Supramol.Chem.* 195792007

Compound Pt\_41 (MIXFAB) has a ccd distance of 3.899(3) angstrom, a plane-plane angle (ppa) of 0.0(3) degrees , and a slippage of 1.323 angstrom. REF: M.Corona-Rodriguez, S.Hernandez-Ortega, J.Valdes-Martinez, D.Morales-Morales *Supramol.Chem.* 195792007

Compound Pt\_42 (OPOGOQ) has a ccd distance of 3.293(5) angstrom, a plane-plane angle (ppa) of 1.2(5) degrees , and a slippage of 0.057 angstrom. REF: Su-Kyung Lee, Dong-Youn Noh *Inorg.Chem.Commun.* 131832010

Compound Pt\_43 (OPOGOQ) has a ccd distance of 3.293(5) angstrom, a plane-plane angle (ppa) of 1.2(5) degrees , and a slippage of 0.014 angstrom. REF: Su-Kyung Lee, Dong-Youn Noh *Inorg.Chem.Commun.* 131832010

Compound Pt\_44 (TAGZUX) has a ccd distance of 3.504(7) angstrom, a plane-plane angle (ppa) of 0.0(6) degrees , and a slippage of 1.101 angstrom. REF: J.Bautista, A.Bertran, S.Bernes, U.Duran, H.Torrens *Rev.Soc.Quim.Mexico* 47442003

Compound Pt\_45 (VACTAX) has a ccd distance of 3.633(6) angstrom, a plane-plane angle (ppa) of 15.8(5) degrees , and a slippage of 0.762 angstrom. REF: S.Bernes, F.J.Melendez, H.Torrens *Acta Crystallogr.,Sect.C:Cryst.Struct.Chem.* 722682016

Compound Pt\_46 (VACTAX) has a ccd distance of 3.708(7) angstrom, a plane-plane angle (ppa) of 17.2(6) degrees , and a slippage of 0.891 angstrom. REF: S.Bernes, F.J.Melendez, H.Torrens *Acta Crystallogr.,Sect.C:Cryst.Struct.Chem.* 722682016

Compound Rh\_1 (JISSOT) has a ccd distance of 3.482(3) angstrom, a plane-plane angle (ppa) of .52(18) degrees , and a slippage of 0.999 angstrom. REF: D.Cruz-Garritz, J.Garcia-Alejandre, H.Torrens, C.Alvarez, R.A.Toscano, R.Poilblanc, A.Thorez *Transition Met.Chem.* 161301991

Compound Rh\_2 (JISSOT) has a ccd distance of 3.482(3) angstrom, a plane-plane angle (ppa) of .52(18) degrees , and a slippage of 0.979 angstrom. REF: D.Cruz-Garritz, J.Garcia-Alejandre, H.Torrens, C.Alvarez, R.A.Toscano, R.Poilblanc, A.Thorez *Transition Met.Chem.* 161301991

Compound Rh\_3 (NADSUI) has a ccd distance of 3.6462(9) angstrom, a plane-plane angle (ppa) of 5.84(7) degrees , and a slippage of 0.468 angstrom. REF: M.J.Wiester, A.B.Braunschweig, Hyojong Yoo, C.A.Mirkin *Inorg.Chem.* 4971882010

Compound Rh\_4 (NADSUI) has a ccd distance of 3.7912(9) angstrom, a plane-plane angle (ppa) of 8.70(7) degrees , and a slippage of 0.7 angstrom. REF: M.J.Wiester, A.B.Braunschweig, Hyojong Yoo, C.A.MirkinInorg.Chem. 4971882010

Compound Rh\_5 (NADSUI) has a ccd distance of 3.7913(9) angstrom, a plane-plane angle (ppa) of 8.70(7) degrees , and a slippage of 0.713 angstrom. REF: M.J.Wiester, A.B.Braunschweig, Hyojong Yoo, C.A.MirkinInorg.Chem. 4971882010

Compound Ru\_1 (IQIDOD) has a ccd distance of 3.722(2) angstrom, a plane-plane angle (ppa) of .83(19) degrees , and a slippage of 1.178 angstrom. REF: Ka-Wang Chan, Wai-Ming Ng, Wai-Man Cheung, Chun-Sing Lai, H.H.Y.Sung, I.D.Williams, Wa-Hung LeungJ.Organomet.Chem. 8121512016

Compound Ru\_2 (IQIDOD) has a ccd distance of 3.796(2) angstrom, a plane-plane angle (ppa) of 6.7(2) degrees , and a slippage of 1.212 angstrom. REF: Ka-Wang Chan, Wai-Ming Ng, Wai-Man Cheung, Chun-Sing Lai, H.H.Y.Sung, I.D.Williams, Wa-Hung LeungJ.Organomet.Chem. 8121512016

Compound Ru\_3 (OFIBAG) has a ccd distance of 3.6805(14) angstrom, a plane-plane angle (ppa) of .48(12) degrees , and a slippage of 0.281 angstrom. REF: Qian-Feng Zhang, F.K.M.Cheung, Wai-Yeung Wong, I.D.Williams, Wa-Hung LeungOrganometallics 2037772001

Compound Ru\_4 (OFIBAG) has a ccd distance of 3.6806(14) angstrom, a plane-plane angle (ppa) of .48(12) degrees , and a slippage of 0.281 angstrom. REF: Qian-Feng Zhang, F.K.M.Cheung, Wai-Yeung Wong, I.D.Williams, Wa-Hung LeungOrganometallics 2037772001

Compound Sn\_1 (PIDMOF) has a ccd distance of 3.522(3) angstrom, a plane-plane angle (ppa) of 0.0(3) degrees , and a slippage of 1.016 angstrom. REF: F.Estudiante-Negrete, R.Redon, S.Hernandez-Ortega, R.A.Toscano, D.Morales-MoralesInorg.Chim.Acta 36016512007

Compound Sn\_2 (PIDMOF) has a ccd distance of 3.788(4) angstrom, a plane-plane angle (ppa) of 18.3(3) degrees , and a slippage of 1.279 angstrom. REF: F.Estudiante-Negrete, R.Redon, S.Hernandez-Ortega, R.A.Toscano, D.Morales-MoralesInorg.Chim.Acta 36016512007
